# Supplementary material for: Consumer attitudes toward bacteriophage applications to pet food
Source: Frontiers journal article supplement (doi:10.3389/fvets.2022.921508), 2022-08-11
Supplement: Data_Sheet_1.PDF [file Data_Sheet_1.PDF]

## **SUPPLEMENTARY DATA SHEET 1**

Access to R code for “Consumer Attitudes Toward Bacteriophage Applications for Food Safety and Environmental Sustainability of Pet Food” available at:

<https://github.com/baileyhe/bacteriophagesurvey.git>
