# Supplementary material for: Consumer attitudes toward bacteriophage applications to pet food
Source: Front Vet Sci. 2022 Aug 11;9:921508. doi: 10.3389/fvets.2022.921508 (PMC9403512; doi:10.3389/fvets.2022.921508)
Supplement: Supplementary Table 1 — Qualtrics survey data. [file Table_1.XLSX]

## Sheet: Sheet1
Start Date	End Date	Source	Response Type	IP	Progress	Duration (in seconds)	Finished	Recorded Date	Response ID	Recipient Last Name	RFN	RLN	External Data Reference	LLA	LLO	Distribution Channel	User Language	Q_RecaptchaScore	Do you have a dog(s), cat(s) or both? - Dog(s)	Do you have a dog(s), cat(s) or both? - Cat(s)	What do you feed your pet for meals? Select all that apply.	Please specify the type of environmentally conscious protein source you use to feed your pet for meals.	Please specify the "other" type of food you use to feed your pet for meals.	What do you feed your pet(s) for treats? Select all that apply.	Please specify which environmentally conscious protein source treats you use to feed your pet(s).	Please specify the "other" type of treats you feed your pet.	It is important to me that the food I am feeding my pet is safe to eat and will not make him/her sick.	I am concerned that bacteria in raw pet foods can make pets and/or people sick	I am concerned that bacteria in canned pet foods and treats can make pets and/or people sick	I am concerned that bacteria in dry pet foods and treats can make pets and/or people sick	I am concerned that bacteria in freeze dried or dehydrated food and treats can make pets and/or people sick	I wash my hands with soap and water after handling raw pet food or treats	I wash my hands with soap and water after handling canned pet food or treats	I wash my hands with soap and water after handling dry pet food or treats	Where possible, I store pet food and/or treats away from where human food is stored or prepared	I scoop pet food using my pet’s food bowl	I use a dedicated scoop/spoon/cup/utensil to serve pet food	I clean and disinfect surfaces that raw pet food touches	I thaw raw pet food on a countertop or in a sink	Organic pet food is more environmentally sustainable than conventional pet food	A natural pet food option is more sustainable than a conventional one	Sustainability is defined as the preservation of resources for future generations	Protein sources are variable in their environmental sustainability scoring (e.g. beef, tofu)	Minimizing food waste promotes environmental sustainability	Environmental sustainability of pet food is important to me	Environmental sustainability guides my decisions when purchasing pet food	A bacteriophage is a type of virus that infects and kills bacteria	Bacteriophages are naturally occurring on earth	Bacteriophages are exclusively produced in a laboratory
44071.7	44071.7	SocialMedia	IP Address		100	255	True	44071.7	R_22tCFp2P1cWXYIf							anonymous	EN	0.9	Yes	No	Dry kibble			Dry kibble,Freeze dried or dehydrated,Snack product (e.g. ‘Pup-Peroni’ or ‘Milk-bone’)			1	3	3	3	4			2	4	1	5			2	3	4	3	4	4	2	2	4	2
44071.6	44071.6	SocialMedia	IP Address		100	287	True	44071.6	R_1j80nOin9Xvp3Xr							anonymous	EN	0.9	Yes	Yes	Canned wet ,Dry kibble ,Freeze dried or dehydrated			Freeze dried or dehydrated,Snack product (e.g. ‘Pup-Peroni’ or ‘Milk-bone’)			5	3	3	3	3		4	4	4	1	5			3	2	4	4	4	3	1	4	4	3
44072.3	44072.3	SocialMedia	IP Address		100	348	True	44072.3	R_XvwdbLbv3BQqEEh							anonymous	EN	0.9	No	Yes	Canned wet ,Dry kibble			Home-prepared raw			5	3	2	1	1	4	1	2	5	1	5	2	1	2	2	4	5	5	4	2	3	5	2
44072.2	44072.2	SocialMedia	IP Address		100	352	True	44072.2	R_2CQCy0mURpIwjW3							anonymous	EN	0.9	No	Yes	Canned wet ,Dry kibble			Leftovers,Snack product (e.g. ‘Pup-Peroni’ or ‘Milk-bone’)			5	5	2	1	2		1	1	1	1	5			1	1	5	4	5	4	3	5	5	2
44092	44092	SocialMedia	IP Address		100	380	True	44092	R_3dWhHcqudhpELs5							anonymous	EN	0.9	Yes	No	Canned wet ,Dry kibble			Leftovers,Freeze dried or dehydrated			5	4	2	2	2		4	4	5	1	5			3	3	4	4	4	4	4	4	4	2
44071.6	44071.6	SocialMedia	IP Address		100	387	True	44071.6	R_3oC6iOxfseNDPsn							anonymous	EN	0.9	Yes	No	Commercial-prepared raw			Dry kibble,Freeze dried or dehydrated,Snack product (e.g. ‘Pup-Peroni’ or ‘Milk-bone’)			5	4	4	4	4	3		1	1	1	1	3	4	3	3	4	5	5	4	2	4	4	2
44074.3	44074.3	SocialMedia	IP Address		100	426	True	44074.3	R_0UnR9bRbjoEuXMl							anonymous	EN	0.9	Yes	No	Home-prepared raw			Freeze dried or dehydrated			4	1	3	4	2	4			1	1	1	1	1	3	3	4	4	4	2	2	4	4	1
44071.9	44071.9	SocialMedia	IP Address		100	443	True	44071.9	R_6rGYbYCytGADQYh							anonymous	EN	0.9	No	Yes	Canned wet ,Dry kibble			Snack product (e.g. ‘Pup-Peroni’ or ‘Milk-bone’)			5	3	3	2	3		2	1	1	2	4			3	4	5	5	5	4	2	5	5	1
44072.8	44072.9	SocialMedia	IP Address		100	453	True	44072.9	R_1kUn2rcsygP7Vqf							anonymous	EN	0.9	Yes	Yes	Home-prepared raw,Freeze dried or dehydrated			Commercial-prepared raw,Home-prepared raw,Freeze dried or dehydrated			4	1	2	2	1	5			2	1	3	5	4	4	2	4	4	4	4	3	3	4	3
44071.6	44071.6	SocialMedia	IP Address		100	485	True	44071.6	R_1mRAYDDWXKf3nen							anonymous	EN	0.9	Yes	No	Dry kibble			Leftovers,Freeze dried or dehydrated,Snack product (e.g. ‘Pup-Peroni’ or ‘Milk-bone’)			5	4	2	2	2			2	5	1	5			1	1	5	4	5	5	2	5	5	1
44036.4	44036.4	Mturk	IP Address		100	490	True	44036.4	R_roGdkBWfTr51sR3							anonymous	EN	0.9	Yes	No	Canned wet ,Dry kibble ,Home-prepared raw,Leftovers			Canned wet,Dry kibble,Commercial-prepared raw,Home-prepared raw,Snack product (e.g. ‘Pup-Peroni’ or ‘Milk-bone’), Environmentally conscious protein source (e.g. insect protein)	pedigree is one of the protein source I used to feed to my dog		5	5	5	2	4	5	5	5	5	5	5	5	5	5	5	5	5	5	5	5	4	4	4
44036.4	44036.4	Mturk	IP Address		100	493	True	44036.4	R_1jlxWPeqgzQli9C							anonymous	EN	0.9	Yes	No	Dry kibble			Snack product (e.g. ‘Pup-Peroni’ or ‘Milk-bone’),Other		Peanut Butter, banana, blueberries	4	3	3	3	3			2	3	2	5			4	3	5	4	4	3	3	3	3	3
44071.9	44071.9	SocialMedia	IP Address		100	499	True	44071.9	R_20SClp14Bqxwvhl							anonymous	EN	0.9	Yes	Yes	Canned wet ,Dry kibble			Canned wet,Dry kibble			5	5	4	4	4		2	2	3	2	4			3	3	5	5	5	4	3	5	5	1
44036.4	44036.4	Mturk	IP Address		100	502	True	44036.4	R_ugL057zHEpRnoS5							anonymous	EN	0.9	Yes	No	Dry kibble ,Home-prepared raw,Freeze dried or dehydrated			Dry kibble,Home-prepared raw,Leftovers			5	5	4	5	4	5		5	4	5	2	4	5	4	5	5	5	5	5	5	4	5	5
44036.4	44036.4	Mturk	IP Address		100	502	True	44036.4	R_25vFuWwRtX7pgHO							anonymous	EN	0.9	Yes	No	Dry kibble ,Leftovers			Canned wet,Dry kibble,Leftovers,Snack product (e.g. ‘Pup-Peroni’ or ‘Milk-bone’)			4	2	3	1	4		3	5	5	5	1			4	4	4	3	4	4	3	4	4	2
44036.4	44036.4	Mturk	IP Address		100	511	True	44036.4	R_3j8pigFk6zYuFiC							anonymous	EN	0.9	No	Yes	Dry kibble ,Leftovers			Canned wet			5	3	3	2	2		3	3	4	5	3			4	3	5	4	5	4	3	3	3	3
44072.3	44072.3	SocialMedia	IP Address		100	511	True	44072.3	R_12FJpmJY6Hf7lF8							anonymous	EN	0.9	Yes	Yes	Dry kibble ,Commercial-prepared raw			Commercial-prepared raw,Home-prepared raw,Freeze dried or dehydrated			5	2	4	4	2	5		4	2	2	4	4	4	3	3	5	4	4	4	4	3	3	3
44071.6	44071.6	SocialMedia	IP Address		100	543	True	44071.6	R_D7dlIe7jaHJOEF3							anonymous	EN	0.9	No	Yes	Canned wet ,Dry kibble ,Commercial-prepared raw,Freeze dried or dehydrated			Canned wet,Freeze dried or dehydrated			5	3	3	3	2	5	5	5	4	1	5	4	3	3	3	4	3	4	4	3	3	4	2
44036.4	44036.4	Mturk	IP Address		100	552	True	44036.4	R_2aPs76idcmzg4oW							anonymous	EN	0.7	Yes	No	Canned wet ,Dry kibble			Snack product (e.g. ‘Pup-Peroni’ or ‘Milk-bone’)			5	5	5	5	4		4	3	5	1	5			3	3	5	3	5	4	3	3	3	3
44072.2	44072.2	SocialMedia	IP Address		100	552	True	44072.2	R_33sutnBKARtQS30							anonymous	EN	0.9	Yes	Yes	Dry kibble			Home-prepared raw			5	4	4	4	4	5		3	4	1	5	4	2	3	3	5	5	4	4	3	3	5	2
44071.7	44071.7	SocialMedia	IP Address		100	560	True	44071.7	R_1K2cKffqNLiy98X							anonymous	EN	0.9	Yes	Yes	Commercial-prepared raw,Home-prepared raw			Freeze dried or dehydrated, Environmentally conscious protein source (e.g. insect protein)	Different proteins chicken is such an over used protein that the reason why so many pets are allergic to it		5	1	5	5	3	4			1	1	3	2	5	1	1	4	5	5	4	3	5	3	1
44071.7	44071.7	SocialMedia	IP Address		100	571	True	44071.7	R_3PX3dWj1qStG9iR							anonymous	EN	0.9	No	Yes	Canned wet ,Freeze dried or dehydrated			Snack product (e.g. ‘Pup-Peroni’ or ‘Milk-bone’)			5	4	4	4	4		4		5	1	5			3	3	4	5	4	3	2	4	4	2
44036.4	44036.4	Mturk	IP Address		100	575	True	44036.4	R_1FD5KPwgrffReTy							anonymous	EN	0.9	Yes	Yes	Canned wet ,Leftovers,Freeze dried or dehydrated			Snack product (e.g. ‘Pup-Peroni’ or ‘Milk-bone’)			4	5	4	5	5		4		5	4	5			4	3	5	5	5	4	5	5	3	3
44036.4	44036.4	Mturk	IP Address		100	582	True	44036.4	R_e5sTaUmxIoXslMJ							anonymous	EN	0.9	No	Yes	Canned wet ,Dry kibble			Snack product (e.g. ‘Pup-Peroni’ or ‘Milk-bone’)			5	4	4	2	1		5	5	5	1	5			4	3	5	5	5	5	2	5	5	1
44036.4	44036.4	Mturk	IP Address		100	610	True	44036.4	R_2ASUelceNucsmiH							anonymous	EN	0.9	No	Yes	Canned wet ,Dry kibble			Snack product (e.g. ‘Pup-Peroni’ or ‘Milk-bone’)			5	4	4	4	4		4	4	4	1	5			4	4	4	4	5	4	4	3	3	3
44084.6	44084.6	SocialMedia	IP Address		100	610	True	44084.6	R_3m7yUoTHWMkkdHT							anonymous	EN	0.9	Yes	No	Dry kibble			Freeze dried or dehydrated,Snack product (e.g. ‘Pup-Peroni’ or ‘Milk-bone’)			5	5	3	3	3			2	3	1	5			1	1	5	5	5	3	2	5	5	1
44036.4	44036.4	Mturk	IP Address		100	621	True	44036.4	R_1KxmkNXMEhMcnVW							anonymous	EN	0.9	Yes	No	Canned wet ,Dry kibble ,Leftovers,Other		We give our dog food that is prepared at home like vegetables and such, but it's neither raw nor leftovers.	Canned wet,Leftovers,Freeze dried or dehydrated,Snack product (e.g. ‘Pup-Peroni’ or ‘Milk-bone’)			5	4	2	1	1		2	1	3	1	5			4	4	5	3	5	4	2	3	3	3
44036.4	44036.4	Mturk	IP Address		100	624	True	44036.4	R_3oTpD7FBKpTSEwT							anonymous	EN	0.9	Yes	Yes	Canned wet ,Dry kibble ,Leftovers			Leftovers,Snack product (e.g. ‘Pup-Peroni’ or ‘Milk-bone’)			4	4	4	4	4		5	5	5	3	1			2	2	4	4	4	3	2	4	4	2
44036.4	44036.4	Mturk	IP Address		100	659	True	44036.4	R_UMUZGnBuuw7v9OV							anonymous	EN	0.9	Yes	Yes	Dry kibble			Snack product (e.g. ‘Pup-Peroni’ or ‘Milk-bone’)			5	2	3	2	2			2	5	1	5			2	3	4	4	3	2	2	3	3	3
44036.4	44036.4	Mturk	IP Address		100	667	True	44036.4	R_3G0Tn3dNolyRtwD							anonymous	EN	0.9	Yes	No	Dry kibble ,Commercial-prepared raw,Home-prepared raw			Dry kibble,Commercial-prepared raw			4	4	4	5	4	5		4	4	4	4	5	5	4	2	4	4	4	2	4	4	4	5
44071.5	44071.6	SocialMedia	IP Address		100	678	True	44071.6	R_22ul8oeKMhhapdp							anonymous	EN	0.9	Yes	Yes	Canned wet ,Dry kibble ,Home-prepared raw,Leftovers			Dry kibble,Home-prepared raw,Leftovers,Freeze dried or dehydrated,Snack product (e.g. ‘Pup-Peroni’ or ‘Milk-bone’)			5	3	3	3	3	5	5	4	5	1	5	5	3	4	4	4	4	5	5	4	5	5	1
44071.6	44071.6	SocialMedia	IP Address		100	685	True	44071.6	R_3qDbxO8IyKLiA53							anonymous	EN	0.9	No	Yes	Canned wet ,Dry kibble			Leftovers,Snack product (e.g. ‘Pup-Peroni’ or ‘Milk-bone’)			5	5	2	2	3		3	2	4	1	5			4	3	4	4	5	4	3	4	5	2
44036.4	44036.4	Mturk	IP Address		100	695	True	44036.4	R_1rp2Hodsjfiatga							anonymous	EN	0.9	Yes	Yes	Canned wet ,Dry kibble			Canned wet,Dry kibble,Home-prepared raw,Leftovers			5	4	2	2	2	4	4	4	5	2	5	5	2	3	3	5	5	5	5	4	1	4	2
44072.8	44072.8	SocialMedia	IP Address		100	715	True	44072.8	R_2rTnJf1Y8Htseva							anonymous	EN	0.9	Yes	No	Dry kibble			Freeze dried or dehydrated,Other		Veggies	1	3	2	2	3			4	5	4	4			3	3	4	5	5	4	3	5	4	2
44036.4	44036.4	Mturk	IP Address		100	717	True	44036.4	R_31EqlUunyagTbqX							anonymous	EN	0.9	No	Yes	Canned wet ,Dry kibble			Leftovers,Snack product (e.g. ‘Pup-Peroni’ or ‘Milk-bone’)			5	5	2	2	2		1	1	4	2	5			4	4	5	4	5	2	2	5	5	1
44036.4	44036.4	Mturk	IP Address		100	726	True	44036.4	R_2v2GL1Cd7tmTY4f							anonymous	EN	0.9	Yes	No	Dry kibble ,Leftovers,Freeze dried or dehydrated			Leftovers,Freeze dried or dehydrated,Snack product (e.g. ‘Pup-Peroni’ or ‘Milk-bone’)			5	4	3	3	3			5	5	5	1			4	4	5	3	5	5	3	3	3	3
44072.4	44072.5	SocialMedia	IP Address		100	732	True	44072.5	R_eILbqhOOI8w4REd							anonymous	EN	0.9	Yes	No	Canned wet ,Dry kibble ,Commercial-prepared raw,Home-prepared raw			Leftovers,Freeze dried or dehydrated			5	1	3	3	3	5	3	3	2	1	5	5	2	3	3	4	4	5	4	3	4	4	2
44071.7	44071.7	SocialMedia	IP Address		100	749	True	44071.7	R_2fuDOGtcsa4a2P8							anonymous	EN	0.9	Yes	Yes	Canned wet ,Dry kibble			Freeze dried or dehydrated,Snack product (e.g. ‘Pup-Peroni’ or ‘Milk-bone’)			5	5	2	3	3		3	3	2	1	5			3	3	4	5	4	4	3	3	3	3
44036.4	44036.4	Mturk	IP Address		100	789	True	44036.4	R_3n3m3d4xTZcb2A4							anonymous	EN	0.9	Yes	No	Dry kibble			Freeze dried or dehydrated,Snack product (e.g. ‘Pup-Peroni’ or ‘Milk-bone’)			4	4	4	4	4			5	5	1	5			4	4	4	4	4	4	3	4	3	4
44036.4	44036.4	Mturk	IP Address		100	794	True	44036.4	R_2B8NukmbJ47lC0j							anonymous	EN	0.9	Yes	No	Commercial-prepared raw,Home-prepared raw,Freeze dried or dehydrated			Commercial-prepared raw,Home-prepared raw,Freeze dried or dehydrated,Snack product (e.g. ‘Pup-Peroni’ or ‘Milk-bone’)			5	4	4	4	3	4			5	5	5	5	4	4	5	4	5	4	5	4	3	3	3
44071.6	44071.6	SocialMedia	IP Address		100	803	True	44071.6	R_12zmeHesElr6Gmt							anonymous	EN	0.9	Yes	Yes	Canned wet ,Dry kibble			Snack product (e.g. ‘Pup-Peroni’ or ‘Milk-bone’)			5	2	4	2	2		2	2	1	1	5			4	3	4	4	5	4	4	4	4	2
44036.4	44036.4	Mturk	IP Address		100	823	True	44036.4	R_2AHk0ICM6c96ikH							anonymous	EN	0.9	Yes	No	Canned wet ,Dry kibble ,Commercial-prepared raw			Canned wet,Dry kibble,Commercial-prepared raw			5	2	2	2	3	4	4	3	4	2	4	4	3	4	4	5	4	4	4	4	2	4	2
44036.4	44036.4	Mturk	IP Address		100	826	True	44036.4	R_2ro7e4JtocZicJj							anonymous	EN	0.9	Yes	Yes	Commercial-prepared raw,Home-prepared raw,Leftovers			Commercial-prepared raw,Leftovers,Snack product (e.g. ‘Pup-Peroni’ or ‘Milk-bone’)			5	2	2	2	2	4			1	2	2	2	1	2	4	4	3	2	4	2	3	4	2
44036.4	44036.4	Mturk	IP Address		100	876	True	44036.4	R_3lDOZxNtmwL12fF							anonymous	EN		Yes	Yes	Home-prepared raw			Home-prepared raw,Snack product (e.g. ‘Pup-Peroni’ or ‘Milk-bone’)			5	3	4	5	4	4			4	5	5	4	4	4	5	4	4	4	4	4	4	4	4
44036.4	44036.4	Mturk	IP Address		100	878	True	44036.4	R_1JRqDN8jaKk8D54							anonymous	EN	0.9	Yes	Yes	Canned wet ,Commercial-prepared raw,Environmentally conscious protein source (e.g. insect protein)	Organix bars		Dry kibble			4	3	3	3	4	5	5	5	5	4	5	5	3	5	4	4	4	5	4	4	3	3	3
44036.4	44036.4	Mturk	IP Address		100	903	True	44036.4	R_2fq8kVjT16IGRlv							anonymous	EN	0.9	Yes	Yes	Canned wet ,Other		Racheal Ray nutrish	Snack product (e.g. ‘Pup-Peroni’ or ‘Milk-bone’)			5	5	4	4	4		3		3	1	5			3	3	4	4	3	4	2	4	4	1
44036.5	44036.5	Mturk	IP Address		100	908	True	44036.5	R_PI3PJbMlntkQH29							anonymous	EN	0.7	Yes	Yes	Commercial-prepared raw,Home-prepared raw			Snack product (e.g. ‘Pup-Peroni’ or ‘Milk-bone’)			3	4	4	3	3	3			4	3	5	3	4	3	4	4	5	4	5	3	4	5	3
44036.4	44036.4	Mturk	IP Address		100	912	True	44036.4	R_2rTQV1AbTRyUixq							anonymous	EN	0.9	Yes	Yes	Commercial-prepared raw,Home-prepared raw			Commercial-prepared raw,Snack product (e.g. ‘Pup-Peroni’ or ‘Milk-bone’)			5	4	3	4	3	5			1	2	4	4	4	4	5	4	4	4	4	3	3	4	3
44036.5	44036.5	Mturk	IP Address		100	916	True	44036.5	R_2uCieEigWckD4au							anonymous	EN	0.9	Yes	Yes	Dry kibble ,Home-prepared raw			Dry kibble,Home-prepared raw,Freeze dried or dehydrated,Snack product (e.g. ‘Pup-Peroni’ or ‘Milk-bone’)			4	4	2	2	3	5		3	5	1	5	5	1	4	4	4	4	4	4	4	3	3	3
44036.4	44036.4	Mturk	IP Address		100	922	True	44036.4	R_1PdEkKszYUIkkjN							anonymous	EN	0.9	No	Yes	Canned wet ,Dry kibble			Leftovers			5	4	4	4	4		3	2	5	1	5			3	3	5	4	5	3	2	3	3	3
44071.8	44071.8	SocialMedia	IP Address		100	929	True	44071.8	R_2DUNa6XdmZOhttQ							anonymous	EN	0.9	Yes	Yes	Canned wet ,Dry kibble			Commercial-prepared raw,Leftovers,Freeze dried or dehydrated,Snack product (e.g. ‘Pup-Peroni’ or ‘Milk-bone’)			5	2	2	2	2	5	4	4	5	1	4	5	2	3	3	4	5	5	5	4	4	4	1
44036.4	44036.4	Mturk	IP Address		100	936	True	44036.4	R_3eej4odysskbhyK							anonymous	EN	0.3	Yes	No	Dry kibble ,Environmentally conscious protein source (e.g. insect protein)	Royal Canin Gastrointestinal Low fat canned food		Dry kibble,Home-prepared raw			5	4	2	4	5	3		4	4	4	4	5	4	5	5	4	4	4	5	5	5	3	2
44036.4	44036.4	Mturk	IP Address		100	936	True	44036.4	R_3m1MVFW1ytciosA							anonymous	EN	0.9	Yes	Yes	Dry kibble			Snack product (e.g. ‘Pup-Peroni’ or ‘Milk-bone’)			5	4	2	1	2			1	5	1	5			3	3	5	5	5	4	2	4	4	1
44036.4	44036.4	Mturk	IP Address		100	973	True	44036.4	R_2tn6Vhms1YKT9pB							anonymous	EN	0.9	No	Yes	Canned wet ,Dry kibble			Snack product (e.g. ‘Pup-Peroni’ or ‘Milk-bone’)			5	3	2	2	3		4	2	5	1	1			3	4	5	4	4	3	2	3	3	3
44036.4	44036.4	Mturk	IP Address		100	992	True	44036.4	R_UJSgR3eO6fL7DLr							anonymous	EN	0.9	Yes	Yes	Canned wet ,Commercial-prepared raw,Home-prepared raw,Freeze dried or dehydrated			Canned wet,Commercial-prepared raw,Home-prepared raw,Freeze dried or dehydrated			5	4	2	2	3	4	4		3	4	5	4	2	5	4	5	4	5	5	5	4	3	3
44072.2	44072.2	SocialMedia	IP Address		100	1013	True	44072.2	R_2XmHHVhtUo0bTJf							anonymous	EN	0.9	No	Yes	Canned wet ,Dry kibble			Dry kibble,Freeze dried or dehydrated			5	5	2	1	1		4	3	1	1	5			3	3	4	5	5	4	2	4	4	1
44071.6	44071.6	SocialMedia	IP Address		100	1050	True	44071.6	R_xhjSKJjbUVtDsNH							anonymous	EN	0.9	No	Yes	Canned wet ,Dry kibble			Freeze dried or dehydrated,Snack product (e.g. ‘Pup-Peroni’ or ‘Milk-bone’)			5	5	3	3	3		5	5	5	1	5			4	3	4	4	4	4	2	5	4	2
44036.4	44036.4	Mturk	IP Address		100	1059	True	44036.4	R_1li37S7YzFzSsuN							anonymous	EN	0.7	Yes	No	Home-prepared raw			Snack product (e.g. ‘Pup-Peroni’ or ‘Milk-bone’)			4	4	5	4	5	5			4	5	4	5	5	4	5	4	5	5	4	5	4	5	4
44036.4	44036.4	Mturk	IP Address		100	1117	True	44036.4	R_2eajtDs3QYzZ0LG							anonymous	EN	0.9	Yes	Yes	Canned wet ,Dry kibble			Snack product (e.g. ‘Pup-Peroni’ or ‘Milk-bone’),Other		Catnip for the cats.	5	4	2	4	2		5	4	5	1	5			3	2	4	4	4	3	2	5	4	1
44036.4	44036.4	Mturk	IP Address		100	1209	True	44036.4	R_2as2EAuxmCYj6LI							anonymous	EN	0.9	Yes	Yes	Canned wet ,Dry kibble			Home-prepared raw,Freeze dried or dehydrated			5	4	4	3	3	5	2	2	3	1	5	5	1	4	3	5	5	5	4	3	3	3	3
44072	44072	SocialMedia	IP Address		100	1213	True	44072	R_1cYxftNCR1t6sVc							anonymous	EN	0.9	Yes	Yes	Commercial-prepared raw,Home-prepared raw			Freeze dried or dehydrated			5	1	4	4	1	5			2	1	1	4	3	3	5	4	4	4	3	3	4	4	2
44036.4	44036.4	Mturk	IP Address		100	1242	True	44036.4	R_2sb9Kwfii1j7VeI							anonymous	EN	0.7	Yes	No	Canned wet ,Dry kibble			Snack product (e.g. ‘Pup-Peroni’ or ‘Milk-bone’)			5	4	3	3	3		5	5	5	3	3			5	5	5	5	5	5	5	4	4	2
44036.4	44036.4	Mturk	IP Address		100	1410	True	44036.4	R_2aqKcS4O52EWtSg							anonymous	EN	0.9	Yes	Yes	Dry kibble			Dry kibble			5	4	4	3	4			5	4	5	4			4	4	4	5	4	4	4	3	4	2
44036.4	44036.4	Mturk	IP Address		100	1444	True	44036.4	R_2PwlEVntj0RLrGI							anonymous	EN	0.7	Yes	Yes	Canned wet ,Dry kibble ,Home-prepared raw,Leftovers,Freeze dried or dehydrated			Dry kibble,Commercial-prepared raw,Home-prepared raw,Leftovers,Freeze dried or dehydrated,Snack product (e.g. ‘Pup-Peroni’ or ‘Milk-bone’)			5	4	4	4	5	4	4	3	5	4	4	5	4	5	4	5	4	5	4	5	5	5	4
44072.5	44072.5	SocialMedia	IP Address		100	1599	True	44072.5	R_2a8Bm8ucmumAPZk							anonymous	EN	0.9	No	Yes	Canned wet ,Commercial-prepared raw			Canned wet,Freeze dried or dehydrated			5	2	3	3	3	5	5		5	1	2	5	1	4	4	4	4	4	4	3	4	4	2
44071.6	44071.6	SocialMedia	IP Address		100	1609	True	44071.6	R_2uW1TI8BQBGfz8P							anonymous	EN	0.9	No	Yes	Canned wet ,Home-prepared raw			Freeze dried or dehydrated			5	2	2	4	2	5	5		2	1	4	5	2	3	3	4	4	4	4	3	3	3	3
44088	44088	SocialMedia	IP Address		100	1624	True	44088	R_3pg6uuTQqlMGyvK							anonymous	EN	0.9	Yes	Yes	Canned wet ,Dry kibble			Freeze dried or dehydrated,Snack product (e.g. ‘Pup-Peroni’ or ‘Milk-bone’)			5	3	3	3	3		5	5	2	1	5			4	3	4	5	5	5	3	3	3	3
44036.4	44036.4	Mturk	IP Address		100	1711	True	44036.4	R_10pBcA3zkRjh5UA							anonymous	EN	0.9	No	Yes	Canned wet ,Dry kibble ,Leftovers			Dry kibble			5	4	3	2	3		5	5	4	5	5			3	3	5	4	4	2	1	3	3	2
44036.4	44036.4	Mturk	IP Address		100	1726	True	44036.4	R_01C1FciMCvtXU89							anonymous	EN	0.9	Yes	Yes	Dry kibble			Leftovers			5	4	4	4	4			2	5	4	2			3	3	4	4	4	3	2	4	4	2
44036.4	44036.4	Mturk	IP Address		100	1861	True	44036.4	R_2wdJAtttxIMf5KT							anonymous	EN	0.9	Yes	No	Canned wet ,Dry kibble			Snack product (e.g. ‘Pup-Peroni’ or ‘Milk-bone’)			5	5	2	2	2		4	4	4	3	3			3	3	5	5	5	2	1	3	3	3
44071.6	44071.6	SocialMedia	IP Address		100	1885	True	44071.6	R_1gGwHZzcbULIs6f							anonymous	EN	0.9	No	Yes	Canned wet ,Commercial-prepared raw,Freeze dried or dehydrated			Freeze dried or dehydrated			5	3	2	4	3	5	5		4	1	5	5	3	2	3	3	5	3	3	2	4	4	3
44071.6	44071.6	SocialMedia	IP Address		100	1896	True	44071.6	R_2BgQsts2UCZHcXy							anonymous	EN	0.9	Yes	No	Home-prepared raw			Freeze dried or dehydrated			5	1	5	5	3	5			5	1	5	5	4	3	3	4	4	4	4	3	2	3	3
44036.4	44036.4	Mturk	IP Address		100	2046	True	44036.4	R_QbPqFMFEJZ8qhod							anonymous	EN	0.9	Yes	Yes	Canned wet ,Dry kibble ,Commercial-prepared raw,Home-prepared raw			Canned wet,Dry kibble			5	4	4	4	4	4	4	4	5	5	5	4	2	4	5	5	4	5	4	5	5	4	3
44036.4	44036.4	Mturk	IP Address		100	2293	True	44036.4	R_1jV55uSZf29y1Pf							anonymous	EN	0.7	Yes	Yes	Canned wet ,Commercial-prepared raw,Home-prepared raw,Environmentally conscious protein source (e.g. insect protein)	Chicken meat and vegetables		Canned wet,Commercial-prepared raw,Freeze dried or dehydrated,Snack product (e.g. ‘Pup-Peroni’ or ‘Milk-bone’)			3	5	4	3	4	3	5		4	2	4	3	5	4	3	5	3	4	3	5	3	4	3
44036.4	44036.4	Mturk	IP Address		100	2405	True	44036.4	R_1QlSXDcY31A1t8J							anonymous	EN	0.9	Yes	No	Canned wet ,Dry kibble ,Leftovers			Leftovers,Snack product (e.g. ‘Pup-Peroni’ or ‘Milk-bone’),Other		Pig and/or lamb ears, rawhides (limited)	5	4	4	4	3		4	3	4	1	5			3	3	4	3	4	3	2	4	4	2
44036.4	44036.4	Mturk	IP Address		100	3272	True	44036.4	R_1d4updqYZ44JttB							anonymous	EN	0.9	Yes	Yes	Canned wet ,Dry kibble ,Leftovers,Freeze dried or dehydrated			Snack product (e.g. ‘Pup-Peroni’ or ‘Milk-bone’)			5	4	4	2	2		5	5	5	2	5			5	5	4	4	5	5	5	4	5	5
44071.6	44071.7	SocialMedia	IP Address		100	3721	True	44071.7	R_1EdsuGCQqTOdcd9							anonymous	EN	0.9	Yes	No	Canned wet ,Dry kibble			Leftovers,Freeze dried or dehydrated,Snack product (e.g. ‘Pup-Peroni’ or ‘Milk-bone’)			5	4	3	3	3		3	2	5	1	5			3	3	4	5	5	4	3	5	4	3
44036.4	44036.4	Mturk	IP Address		100	4104	True	44036.4	R_2b11fsDEgvlB7aJ							anonymous	EN	0.9	Yes	Yes	Dry kibble ,Commercial-prepared raw,Home-prepared raw			Dry kibble,Commercial-prepared raw,Home-prepared raw			3	4	3	4	4	5		4	3	4	4	4	3	3	4	4	4	3	5	3	3	4	3
44073.3	44073.3	SocialMedia	IP Address		100	4510	True	44073.3	R_3EmT9UZDgwOLFXc							anonymous	EN	0.9	Yes	No	Dry kibble ,Freeze dried or dehydrated			Leftovers,Freeze dried or dehydrated			5	5	5	5	5			4	4	3	5			4	4	4	4	4	5	5	3	3	3
44092.4	44092.6	SocialMedia	IP Address		100	16818	True	44092.6	R_3n2UVOfJgrEV4hk							anonymous	EN	0.9	No	Yes	Dry kibble ,Commercial-prepared raw,Home-prepared raw,Freeze dried or dehydrated			Dry kibble,Home-prepared raw,Freeze dried or dehydrated,Snack product (e.g. ‘Pup-Peroni’ or ‘Milk-bone’)			5	4	4	3	3	5		3	5	1	5	5	4	4	4	4	4	5	5	3	4	4	2
[truncated: 39 more columns]
